# Supplementary material
Source: publisher site journal article supplement (https://www.dovepress.com/get_supplementary_file.php?f=249409.docx)
Supplement: Supplementary file 1 [file get_supplementary_file.php]

**Table S1.** Comparison of demographic characteristics between those patients who were excluded or not.

| Characteristics | | Patients | | | Between-group comparison |
| --- | --- | --- | --- | --- | --- |
|  | | Total  (n = 56) | Excluded  (n = 19) | Not excluded  (n = 37) | *p* |
| Gender, n female (%) | 30 (54) | 12 (63) | 18 (49) | 0.40 |
| Age *(yr)*, mean (SD) | 62 (9) | 62 (9) | 63 (9) | 0.72 |
| Height *(cm)*, mean (SD) | 165 (8) | 164 (9) | 165 (7) | 0.68 |
| Body-mass *(kg)*, mean (SD) | 67 (17) | 67 (21) | 67 (15) | 0.98 |
| Body mass index *(kg/m²)*, mean (SD) | 24.5 (5.2) | 24.6 (6.5) | 24.5 (4.6) | 0.94 |
| FEV1 *(L)*, mean (SD) | 0.9 (0.3) | 0.8 (0.3 | 1.0 (0.4) | 0.08 |
| FEV1 *(%)*, mean (SD) | 37 (12) | 34 (11) | 39 (12) | 0.17 |
| FVC *(L)*, mean (SD) | 2.3 (0.8) | 2.2 (0.7) | 2.4 (0.8) | 0.19 |
| FVC *(%)*, mean (SD) | 75 (19) | 71 (19) | 77 (18) | 0.32 |
| FEV1/FVC *(%)*, mean (SD) | 41 (10) | 40 (12) | 41 (9) | 0.74 |
| Residual volume *(L)*, mean (SD) | 4.1 (1.3) | 4.2 (1.4) | 4.1 (1.3) | 0.72 |
| Residual volume *(%)*, mean (SD) | 193 (70) | 209 (77) | 184 (65) | 0.23 |
| TLC *(L)*, mean (SD) | 6.6 (1.4) | 6.4 (1.4) | 6.7 (1.5) | 0.48 |
| TLC *(%)*, mean (SD) | 120 (22) | 121 (27) | 120 (19) | 0.81 |
| VO2peak *(ml/kg/min)*, mean (SD) | 12 (3) | 12 (3) | 13 (4) | 0.41 |
| Wpeak *(W)*, median (IQR) | 50 (39 to 63) | 50 (40 to 60) | 50 (33 to 70) | 1.00 |
| 6MST *(steps)*, mean (SD) | 173 (67) | 167 (56) | 175 (72) | 0.73 |
| 6MWT *(meters)*, mean (SD) | 386 (115) | 377 (127) | 391 (110) | 0.70 |
| BODE index, mean (SD) | 5 (2) | 5 (2) | 5 (2) | 0.53 |
| Long-term oxygen, n (%) | 27 (48) | 8 (42) | 19 (51) | 0.58 |
| Home non-invasive ventilation, n (%) | 7 (13) | 3 (16) | 4 (11) | 0.68 |
| HAD-Anxiety, mean (SD) | 10 (4) | 11 (5) | 8 (4) | 0.07 |
| HAD-Depression, median (SD) | 8 (5 to 10) | 8 (4 to 10) | 8 (5 to 10) | 0.94 |
| Saint Georges Respiratory Questionnaire *(%)*, median (IQR) | 57 (51 to 65) | 61 (52 to 82) | 56 (4 to 62) | 0.07 |
| MoCA, median (IQR) | 22 (20 to 26) | 22 (20 to 25) | 22 (22 to 26) | 0.71 |

Fisher test for categorial data. Mann-Whitney or independent t-test for other characteristics.

Percentages may not sum to 100 due to rounding.

FEV1 = forced expiratory volume in one second, FVC = forced vital capacity, TLC = total lung capacity, VO2peak = maximal oxygen consumption, Wpeak = maximal workload achieved during cardiopulmonary exercise testing, 6MWT = six-minute walk test, 6MST = six-minute stepper test, BODE = body-mass index, obstructive, dyspnea and exercise capacity index, HAD = anxiety and depression scale, MoCA = Montreal Cognitive Assessment tool.

**Table S2.** Comparison of demographic characteristics between those patients who attended the 3 months follow-up or not.

| Characteristics | | Patients | | | Between-group comparison |
| --- | --- | --- | --- | --- | --- |
|  | | Total  (n = 37) | Dit not attend  (n = 15) | Attended  (n = 22) | *p* |
| Gender, n female (%) | 18 (49) | 8 (53) | 10 (46) | 0.74 |
| Age *(yr)*, mean (SD) | 63 (9) | 63 (9) | 63 (10) | 0.97 |
| Height *(cm)*, mean (SD) | 165 (7) | 162 (5) | 167 (7) | 0.05 |
| Body-mass *(kg)*, mean (SD) | 67 (15) | 64 (16) | 69 (13) | 0.38 |
| Body mass index *(kg/m²)*, mean (SD) | 24.5 (4.6) | 24.3 (5.4) | 24.6 (4.1) | 0.85 |
| FEV1 *(L)*, mean (SD) | 1.0 (0.4) | 0.9 (0.3) | 1.1 (0.4) | 0.26 |
| FEV1 *(%)*, mean (SD) | 39 (12) | 37 (13) | 40 (13) | 0.55 |
| FVC *(L)*, mean (SD) | 2.4 (0.8) | 2.3 (0.7) | 2.5 (0.8) | 0.29 |
| FVC *(%)*, mean (SD) | 77 (18) | 76 (20) | 78 (18) | 0.76 |
| FEV1/FVC *(%)*, mean (SD) | 41 (9) | 41 (8) | 42 (9) | 0.74 |
| Residual volume *(L)*, mean (SD) | 4.1 (1.3) | 4.1 (0.9) | 4.0 (1.5) | 0.83 |
| Residual volume *(%)*, mean (SD) | 184 (65) | 204 (52) | 170 (70) | 0.15 |
| TLC *(L)*, mean (SD) | 6.7 (1.5) | 6.5 (0.8) | 6.8 (1.8) | 0.55 |
| TLC *(%)*, mean (SD) | 120 (19) | 125 (22) | 116 (19) | 0.25 |
| VO2peak *(ml/kg/min)*, mean (SD) | 13 (4) | 13 (4) | 12 (4) | 0.45 |
| Wpeak *(W)*, mean (SD) | 53 (24) | 52 (22) | 54 (26) | 0.87 |
| 6MST *(steps)*, mean (SD) | 175 (72) | 151 (46) | 189 (81) | 0.18 |
| 6MWT *(meters)*, mean (SD) | 391 (110) | 392 (115) | 390 (111) | 0.97 |
| BODE index, mean (SD) | 5 (2) | 5 (1) | 5 (2) | 0.42 |
| Long-term oxygen, n (%) | 19 (51) | 7 (47) | 12 (55) | 0.74 |
| Home non-invasive ventilation, n (%) | 4 (11) | 3 (20) | 1 (10) | 0.28 |
| HAD-Anxiety, mean (SD) | 9 (4) | 9 (4) | 9 (4) | 0.91 |
| HAD-Depression, median (SD) | 8 (5 to 10) | 8 (5 to 12) | 8 (5 to 9) | 0.47 |
| Saint Georges Respiratory Questionnaire *(%)*, mean (SD) | 54 (15) | 53 (15) | 54 (15) | 0.80 |
| MoCA, median (IQR), baseline | 22 (22 to 26) | 25 (19 to 27) | 22 (20 to 26) | 0.33 |
| MoCA, mean (SD), following PR | 24 (3) | 23 (3) | 24 (3) | 0.38 |

Fisher test for categorial data. Mann-Whitney or independent t-test for other characteristics.

Percentages may not sum to 100 due to rounding.

FEV1 = forced expiratory volume in one second, FVC = forced vital capacity, TLC = total lung capacity, VO2peak = maximal oxygen consumption, Wpeak = maximal workload achieved during cardiopulmonary exercise testing, 6MWT = six-minute walk test, 6MST = six-minute stepper test, BODE = body-mass index, obstructive, dyspnea and exercise capacity index, HAD = anxiety and depression scale, MoCA = Montreal Cognitive Assessment tool, PR = pulmonary rehabilitation.

**Table S3.** Comparison of demographic characteristics between those patients with a baseline MoCA < 26 who were excluded or not.

| Characteristics | | Patients | | | Between-group comparison |
| --- | --- | --- | --- | --- | --- |
|  | | MoCA < 26  (n = 41) | Excluded  (n = 16) | Not excluded  (n = 25) | *p* |
| Gender, n female (%) | 20 (49) | 9 (56) | 11 (44) | 0.53 |
| Age *(yr)*, mean (SD) | 64 (9) | 62 (9) | 64 (8) | 0.51 |
| Height *(cm)*, mean (SD) | 165 (8) | 165 (10) | 165 (6) | 0.83 |
| Body-mass *(kg)*, mean (SD) | 68 (18) | 70 (21) | 67 (15) | 0.55 |
| Body mass index *(kg/m²)*, mean (SD) | 25 (5.5) | 25.7 (6.4) | 24.5 (5) | 0.48 |
| FEV1 *(L)*, mean (SD) | 0.9 (0.6 to 1.2) | 0.8 (0.3) | 1.0 (0.4) | 0.13 |
| FEV1 *(%)*, mean (SD) | 36 (28 to 44) | 33 (11) | 39 (13) | 0.20 |
| FVC *(L)*, mean (SD) | 2.2 (1.6 to 2.7) | 2.1 (0.8) | 2.4 (0.8) | 0.28 |
| FVC *(%)*, mean (SD) | 73 (19) | 70 (19) | 76 (19) | 0.30 |
| FEV1/FVC *(%)*, mean (SD) | 41 (10) | 40 (12) | 42 (9) | 0.72 |
| Residual volume *(L)*, mean (SD) | 4.2 (1.3) | 4.4 (1.3) | 4.1 (1.4) | 0.50 |
| Residual volume *(%)*, mean (SD) | 194 (73) | 216 (77) | 178 (68) | 0.13 |
| TLC *(L)*, mean (SD) | 6.7 (1.4) | 6.6 (1.3) | 6.7 (1.5) | 0.72 |
| TLC *(%)*, mean (SD) | 121 (22) | 123 (25) | 120 (19) | 0.69 |
| VO2peak *(ml/kg/min)*, mean (SD) | 12 (3) | 11 (3) | 12 (4) | 0.59 |
| Wpeak *(W)*, median (IQR) | 45 (36 to 60) | 50 (40 to 60) | 40 (30 to 60) | 0.49 |
| 6MST *(steps)*, mean (SD) | 148 (103 to 202) | 154 (46) | 166 (79) | 0.72 |
| 6MWT *(meters)*, mean (SD) | 377 (117) | 369 (120) | 382 (118) | 0.77 |
| BODE index, mean (SD) | 5 (2) | 6 (2) | 5 (2) | 0.46 |
| Long-term oxygen, n (%) | 22 (54) | 8 (50) | 14 (56) | 0.76 |
| Home non-invasive ventilation, n (%) | 6 (15) | 3 (19) | 3 (12) | 0.66 |
| HAD-Anxiety, mean (SD) | 10 (4) | 11 (5) | 9 (4) | 0.28 |
| HAD-Depression, mean (SD) | 8 (3) | 8 (3) | 8 (3) | 0.48 |
| Saint Georges Respiratory Questionnaire *(%)*, mean (SD) | 62 (15) | 68 (16) | 57 (13) | 0.03 |
| MoCA, mean (SD) | 21 (2) | 22 (2) | 21 (2) | 0.47 |

Fisher test for categorial data. Mann-Whitney or independent t-test for other characteristics.

Percentages may not sum to 100 due to rounding.

MoCA = Montreal Cognitive Assessment tool, FEV1 = forced expiratory volume in one second, FVC = forced vital capacity, TLC = total lung capacity, VO2peak = maximal oxygen consumption, Wpeak = maximal workload achieved during cardiopulmonary exercise testing, 6MWT = six-minute walk test, 6MST = six-minute stepper test, BODE = body-mass index, obstructive, dyspnea and exercise capacity index, HAD = anxiety and depression scale.

**Table S4.** Comparison of demographic characteristics between those patients with a baseline MoCA < 26 who attended the 3 months follow-up or not.

| Characteristics | | Patients | | | Between-group comparison |
| --- | --- | --- | --- | --- | --- |
|  | | Total  (n = 25) | Dit not attend  (n = 8) | Attended  (n = 17) | *p* |
| Gender, n female (%) | 11 (44) | 4 (50) | 7 (41) | 1.00 |
| Age *(yr)*, mean (SD) | 64 (8) | 67 (5) | 63 (9) | 0.36 |
| Height *(cm)*, mean (SD) | 165 (6) | 161 (3) | 167 (7) | <0.01 |
| Body-mass *(kg)*, mean (SD) | 67 (15) | 64 (18) | 68 (15) | 0.54 |
| Body mass index *(kg/m²)*, mean (SD) | 24.5 (5) | 24.6 (6.1) | 24.4 (4.6) | 0.95 |
| FEV1 *(L)*, mean (SD) | 1.0 (0.4) | 0.8 (0.3) | 1.1 (0.4) | 0.14 |
| FEV1 *(%)*, mean (SD) | 39 (13) | 36 (12) | 40 (14) | 0.44 |
| FVC *(L)*, mean (SD) | 2.4 (0.8) | 2.1 (0.6) | 2.6 (0.8) | 0.14 |
| FVC *(%)*, mean (SD) | 76 (19) | 73 (20) | 78 (19) | 0.57 |
| FEV1/FVC *(%)*, mean (SD) | 42 (9) | 41 (9) | 42 (9) | 0.86 |
| Residual volume *(L)*, mean (SD) | 4.1 (1.4) | 4.1 (0.9) | 4.1 (1.6) | 0.92 |
| Residual volume *(%)*, mean (SD) | 178 (68) | 197 (49) | 169 (75) | 0.40 |
| TLC *(L)*, mean (SD) | 6.7 (1.5) | 6.3 (0.7) | 6.9 (1.8) | 0.39 |
| TLC *(%)*, mean (SD) | 120 (19) | 123 (21) | 119 (19) | 0.66 |
| VO2peak *(ml/kg/min)*, mean (SD) | 12 (4) | 12 (4) | 12 (4) | 0.82 |
| Wpeak *(W)*, mean (SD) | 48 (19) | 45 (14) | 49 (21) | 0.64 |
| 6MST *(steps)*, mean (SD) | 166 (79) | 129 (43) | 181 (86) | 0.22 |
| 6MWT *(meters)*, mean (SD) | 382 (118) | 337 (129) | 396 (114) | 0.34 |
| BODE index, median (IQR) | 7 (5 to 7) | 5 (3 to 6) | 5 (4 to 7) | 0.16 |
| Long-term oxygen, n (%) | 14 (56) | 5 (63) | 9 (53) | 1.00 |
| Home non-invasive ventilation, n (%) | 3 (12) | 2 (25) | 1 (6) | 0.23 |
| HAD-Anxiety, mean (SD) | 9 (4) | 10 (4) | 9 (3) | 0.65 |
| HAD-Depression, mean (SD) | 8 (3) | 6 (3) | 7 (4) | 0.64 |
| Saint Georges Respiratory Questionnaire *(%)*, median (IQR) | 58 (52 to 64) | 59 (49 to 63) | 57 (52 to 65) | 0.86 |
| MoCA, mean (SD) | 21 (2) | 21 (3) | 31 (2) | 0.53 |

Fisher test for categorial data. Mann-Whitney or independent t-test for other characteristics.

Percentages may not sum to 100 due to rounding.

MoCA = Montreal Cognitive Assessment tool, FEV1 = forced expiratory volume in one second, FVC = forced vital capacity, TLC = total lung capacity, VO2peak = maximal oxygen consumption, Wpeak = maximal workload achieved during cardiopulmonary exercise testing, 6MWT = six-minute walk test, 6MST = six-minute stepper test, BODE = body-mass index, obstructive, dyspnea and exercise capacity index, HAD = anxiety and depression scale.
